# Supplementary material for: Biogenic Silver and Copper Nanoparticles: Potential Antifungal Agents in Rice and Wheat Crops
Source: MDPI journal article supplement (doi:10.3390/chemistry5040143), 2023-10-06
Supplement: s1 [file s1]

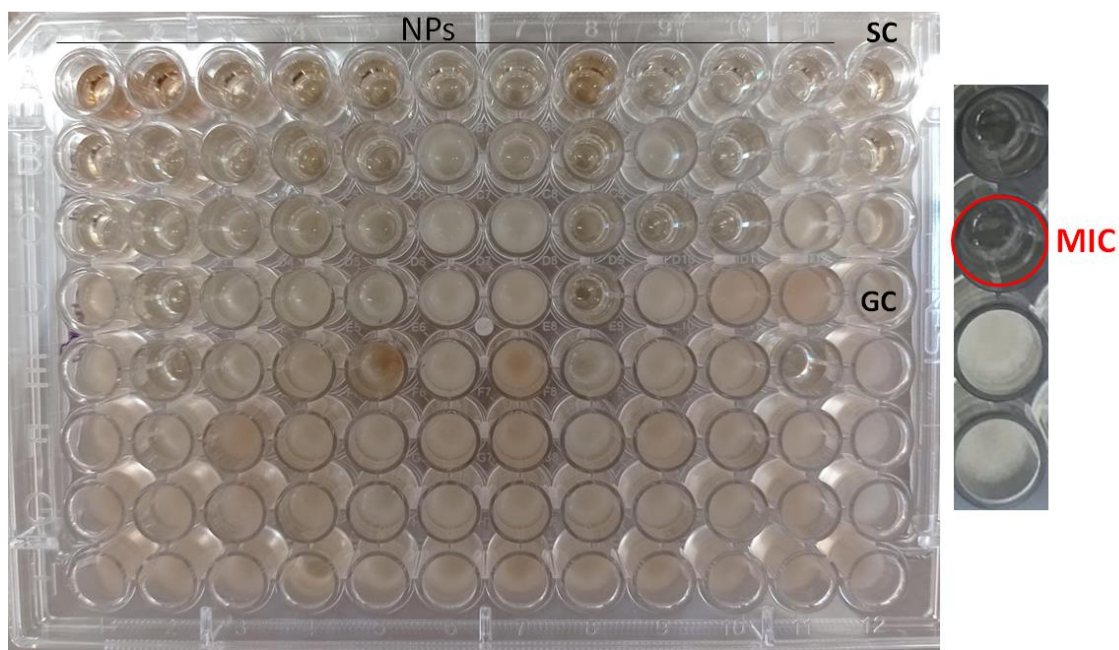

Figure S1. Determination of Minimum Inhibitory Concentration (MIC) against *Pyricularia.oryzae*. SC: sterile control. GC: growth control

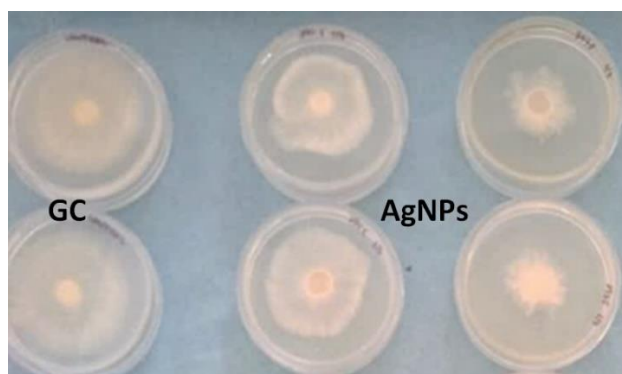

Figure S2. Antifungal activity of AgNPs against *R. oryzae sativae* (% inhibition growth). GC: growth control (PDA). AgNPs: PDA supplemented with AgNPs
